# Supplementary material for: Continuous increase in East Asia HFC-23 emissions inferred from high-frequency atmospheric observations from 2008 to 2019
Source: Copernicus journal article supplement (doi:10.5194/egusphere-2023-6), 2023-01-10
Supplement: Supplementary file 1 [file egusphere-2023-6-supplement.pdf]

## *Supplement of*

# **Continuous increase in East Asia HFC-23 emissions inferred from high-frequency atmospheric observations from 2008 to 2019**

5

Hyeri Park<sup>1</sup>, Jooil Kim<sup>2</sup>, Haklim Choi<sup>3</sup>, Sohyeon Geum<sup>1</sup>, Yeaseul Kim<sup>3</sup>, Rona L. Thompson<sup>4</sup>, Jens Mühle<sup>2</sup>, Peter K. Salameh<sup>2</sup>, Christina M. Harth<sup>2</sup>, Kieran M. Stanley<sup>5</sup>, Simon O'Doherty<sup>5</sup>, Paul J. Fraser<sup>6</sup>, Perter G. Simmonds<sup>5</sup>, Paul B. Krummel<sup>6</sup>, Ray F. Weiss<sup>2</sup>, Ronald G. Prinn<sup>7</sup>, and Sunyoung Park<sup>1,3,\*</sup>

<sup>1</sup>Department of Oceanography, Kyungpook National University, Daegu, Republic of Korea

10 <sup>2</sup>Scripps Institution of Oceanography (SIO), University of California San Diego, La Jolla, California, USA

<sup>3</sup>Kyungpook Institute of Oceanography, Kyungpook National University, Daegu, Republic of Korea, Republic of Korea

<sup>4</sup>Norwegian Institute of Air Research (NILU), Kjeller, Norway

<sup>5</sup>School of Chemistry, University of Bristol, Bristol, UK

15 <sup>6</sup>Climate Science Centre, Commonwealth Scientific and Industrial Research Organisation (CSIRO) Oceans and Atmosphere, Aspendale, Victoria, Australia

<sup>7</sup>Center for Global Change Science, Massachusetts Institute of Technology, Cambridge, MA, USA

*Correspondence to:* Sunyoung Park ([sparky@knu.ac.kr](mailto:sparky@knu.ac.kr))

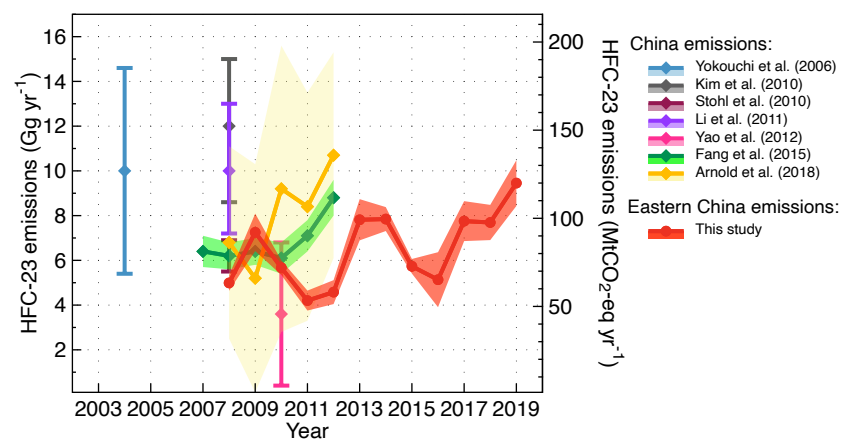

**Figure S1: HFC-23 emissions estimate of eastern China in this study, in comparison with previous estimates of Chinese HFC-23 emissions.**

25 **Table S1: Information on HCFC-22 production factories in eastern China**

| #  | Company Name                                                    | Location       | Information                                                                                                                    |
|----|-----------------------------------------------------------------|----------------|--------------------------------------------------------------------------------------------------------------------------------|
| 1  | Nanjing Jiling Refrigeration Technology Co., Ltd                | Jiangsu        | Company websites                                                                                                               |
| 2  | Jiangsu Huafu Poly Environmental Protection Technology Co., Ltd | Jiangsu        | Company websites                                                                                                               |
| 3  | Harbin Sanyi Refrigeration Equipment Co., Ltd                   | Heilongjian    | Company websites                                                                                                               |
| 4  | Shenyang Guyun Refrigeration Equipment Co., Ltd                 | Liaoning       | Company websites                                                                                                               |
| 5  | Quzhou saitel Chemical Co., Ltd                                 | Zhejiang       | Company websites                                                                                                               |
| 6  | Shandong Danbu Chemical Co., Ltd                                | Shandong       | Company websites                                                                                                               |
| 7  | Hangzhou Wula Chemical Co., Ltd                                 | Zhejiang       | Company websites                                                                                                               |
| 8  | Zhejiang JuHua Co., Ltd = zhengjiang Quhua Co., Ltd             | Zhejiang       | TEAP, 2017                                                                                                                     |
| 9  | Changshu Haike 3F Changsu                                       | Jiangsu        | TEAP, 2017                                                                                                                     |
| 10 | Shandong Dongyue Chemical Co., Ltd                              | Shandong       | TEAP, 2017                                                                                                                     |
| 11 | Jiangsu Meilan Chemical Co., Ltd                                | Jiangsu        | TEAP, 2017                                                                                                                     |
| 12 | 3F Zonghao_Arkema Changshu (Jiangsu)                            | Jiangsu        | TEAP, 2017                                                                                                                     |
| 13 | Limin Chemical Co., Ltd                                         | Zhejiang       | TEAP, 2017                                                                                                                     |
| 14 | Zhejiang Dongyang Chemical Co., Ltd                             | Zhejiang       | Company websites                                                                                                               |
| 15 | Zhonghao Cheguang Research Institute of Chemical Industry       | Sichuan        | TEAP, 2017                                                                                                                     |
| 16 | China Fluoro Technology Co., Ltd                                | Shandong       | <a href="http://cdm.unfccc.int/Projects/DB/DNV-CUK1182313000.09/view">cdm.unfccc.int/Projects/DB/DNV-CUK1182313000.09/view</a> |
| 17 | Yingpeng Chemical Co., Ltd                                      | Zhejiang       | <a href="http://cdm.unfccc.int/Projects/DB/DNV-CUK1215776483.62/view">cdm.unfccc.int/Projects/DB/DNV-CUK1215776483.62/view</a> |
| 18 | Shandong ZhongFu                                                | Shandong       | TEAP, 2017                                                                                                                     |
| 19 | Zhejiang Sanmei Chemical Incorporated Company                   | Zhejiang       | TEAP, 2017                                                                                                                     |
| 20 | Jingxi YingGuang                                                | Jiangxi        | TEAP, 2017                                                                                                                     |
| 21 | Sichuan Zigong Honghe Chemical Co., Ltd.                        | Sichuan        | TEAP, 2017                                                                                                                     |
| 22 | Zhejiang Pengyou                                                | Zhejiang       | TEAP, 2017                                                                                                                     |
| 23 | Jinhua Yonghe Fluorochemical                                    | Zhejiang       | TEAP, 2017                                                                                                                     |
| 24 | Zigong City refrigerant factory                                 | Zigong         | Company websites                                                                                                               |
| 25 | Zigong City reactor Chemical plant                              | Zigong         | Company websites                                                                                                               |
| 26 | Zhonghao Cheguang Chemical Engineering Research Institute       | Sichuan        | Company websites                                                                                                               |
| 27 | Changjiang Chemical Plant                                       | Hebei          | Company websites                                                                                                               |
| 28 | 1194 China Fluoro Technology Co. Ltd.                           | Shandong       | Company websites                                                                                                               |
| 29 | Jinan 3F Fluoro Chemical Co. Ltd.                               | Shandong       | Company websites                                                                                                               |
| 30 | Zhejiang Yonghe New type Refrigerant Co. Ltd.                   | Zhejiang       | Company websites                                                                                                               |
| 31 | Shandong Haihua Group Co. Ltd.                                  | Shandong       | Company websites                                                                                                               |
| 32 | Dongyang Chemical                                               | Jinhua         | Company websites                                                                                                               |
| 33 | Jiangxi Sanmei Chemical                                         | Jiangxi        | TEAP, 2017                                                                                                                     |
| 34 | Changshu 3 Zhonghao New Chemical Materials Co. Ltd.             | Jiangsu        | TEAP, 2017                                                                                                                     |
| 35 | Changshu Atofina 3F Fluorine Chemical Co. Ltd.                  | Jiangsu        | TEAP, 2017                                                                                                                     |
| 36 | Ningbo Koman's Refrigeration Industry Co. Ltd.                  | Zhejiang       | Company websites                                                                                                               |
| 37 | Inner Mongolia Yonghe Fluorochemical Co.                        | Inner Mongolia | Inside Climate News                                                                                                            |
| 38 | Zhejiang Jusheng Fluorochemical Co.=Zhejiang Quhua              | Zhejiang       | Inside Climate News                                                                                                            |
| 39 | Liaocheng Fu'er New Materials Technology Co.                    | Shandong       | Inside Climate News                                                                                                            |
| 40 | Fujian Shaowu Youghe Jintang New Materials Co.                  | Fujian         | Inside Climate News                                                                                                            |
| 41 | Fujian Sannong New Materials Co.                                | Fujian         | Inside Climate News                                                                                                            |
| 42 | Fujian Haidefu New Materials Co.                                | Fujian         | Inside Climate News                                                                                                            |
| 43 | Zongfu Chemical Material Technology Co.                         | Sichuan        | Inside Climate News                                                                                                            |
| 44 | Jianxi Liwen Chemical Co.                                       | Jiangxi        | Inside Climate News                                                                                                            |
| 45 | Shandong Hua Fluorochemical Co.                                 | Shandong       | Inside Climate News                                                                                                            |

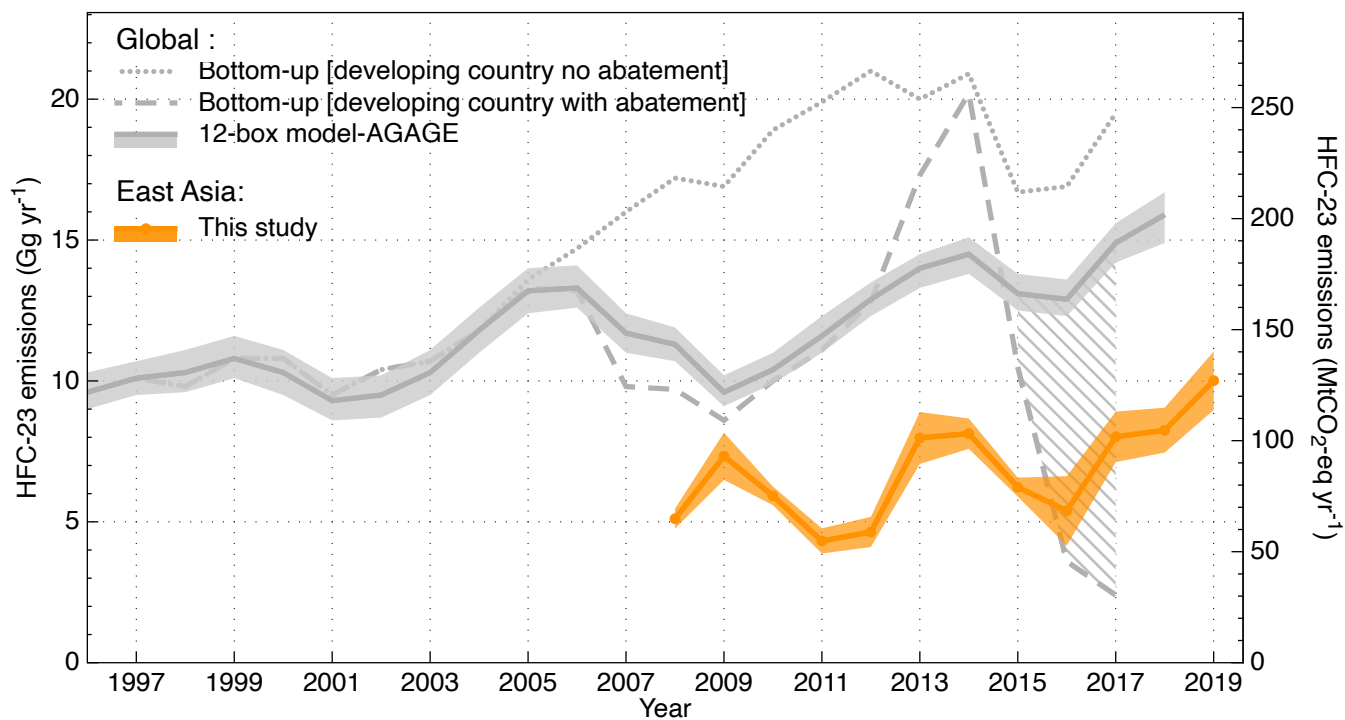

**Figure S2: Observation-based HFC-23 emissions from East Asia versus top-down and bottom-up global HFC-23 emissions derived from AGAGE global data (Simmonds et al., 2018; Stanley et al., 2020).**

### Three different spatial distributions of *a priori* emissions

Our inverse modelling results represent the mean and  $2\text{-}\sigma$  uncertainty of 27 different model runs, where each set of three different *a priori* distributions (Figure S3) have 9 combinations of different *a priori* emission magnitudes. The first prior distribution is the “Population” *a priori*, determined based on the 2010 World population distribution (Warszawski et al., 2017). Population distribution has often been used as a reasonable first approximation when more specific information is not available (Stohl et al., 2010; Fang et al., 2019). The second prior distribution is the “Asiaflat” *a priori*, where the emissions within each country (whole of China, North Korea, South Korea, and whole of Japan) were evenly spread (Rigby et al., 2019; Park et al., 2021). This flattening may cause large *a priori* emissions to be allocated to western China and eastern Japan, where transport sensitivity was relatively low, while at the same time significantly lowering *a priori* emissions in eastern China and western Japan compared to other *a priori* distributions (Kim et al., 2021). The third prior distribution is the “EastAsiaflat” *a priori*, where the population distribution-based emissions are regionally flattened. Flattening regions are determined as the high sensitivity in the model domain (most of the high sensitivity area has less than or equal to  $1^\circ$  by  $1^\circ$ ), i.e., eastern China, South Korea, North Korea, and western Japan. The region denoted “eastern China” contains nine provinces (Anhui, Beijing, Hebei, Jiangsu, Liaoning, Shandong, Shanghai, Tianjin, and Zhejiang) and “western Japan” contains four regions (Chūgoku, Kansai, Kyūshū & Okinawa and Shikoku) (Rigby et al., 2019; Park et al., 2021; Kim et al., 2021). “EastAsiaflat” *a priori* can be unbiased in terms of emission locations, such that the distribution of emissions in the posterior could point to likely emission hot spots, but such inference is reasonable only in regions where the influence of the observations is relatively strong. The *a priori* emissions were kept constants for all years, based on the 2008 emissions. For each *a priori* distribution, we tested 9 different combinations of *a priori* emission magnitudes and uncertainties, which are summarized in Table S2.

Note that our annual HFC-23 results represent the mean of 18 results from two different model runs *a priori* excluding “Asiaflat” *a priori*, because many HCFC-22 factories are located in eastern China, and thus HFC-23 emissions estimates for eastern China using “Asiaflat” *a priori* could be underestimated.

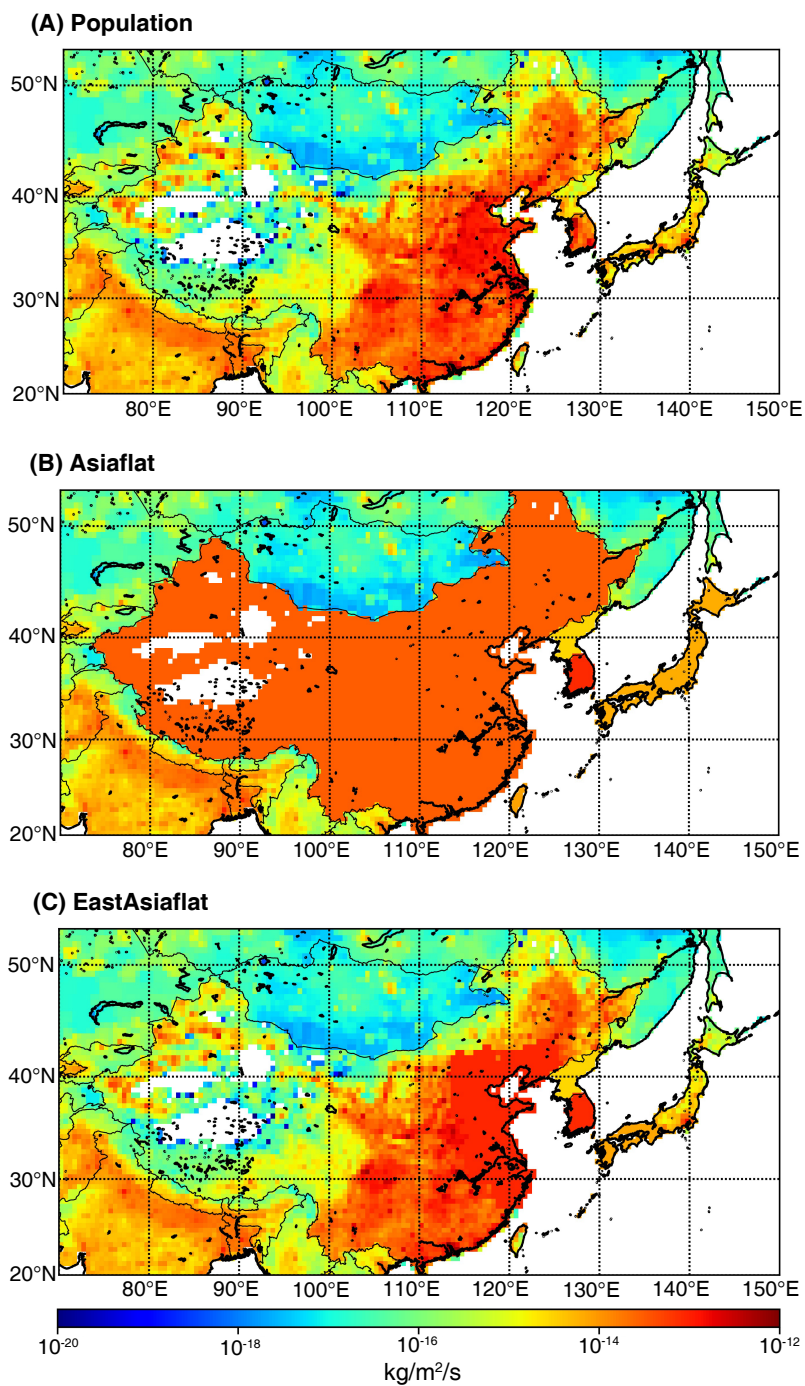

55

**Figure S3: Three different spatial distributions of *a priori* used in this study. (a) *a priori* emissions map based on populations distribution. (b) flat emissions for each country. (c) flat emissions only in the regions with high sensitivity (eastern China, North Korea, South Korea and western Japan).**

60 **Table S2: List of 9 *a priori* configurations, with corresponding errors, applied to each *a priori* distribution. For each *a priori* configuration, the initial *a priori* estimate is multiplied by the listed scaling factor.**

| <i>A priori</i> Emissions |        |           |              |        |              |              |        |              |
|---------------------------|--------|-----------|--------------|--------|--------------|--------------|--------|--------------|
| A priori<br>Dist.         | priori | Error (%) | priori Dist. | priori | Error<br>(%) | priori Dist. | priori | Error<br>(%) |
| Population                | × 0.5  | 100       | Asiaflat     | × 0.5  | 100          | EastAsiaflat | × 0.5  | 100          |
|                           | × 1    | 50        |              | × 1    | 50           |              | × 1    | 50           |
|                           | × 2    | 25        |              | × 2    | 25           |              | × 2    | 25           |
|                           | × 0.5  | 200       |              | × 0.5  | 200          |              | × 0.5  | 200          |
|                           | × 1    | 100       |              | × 1    | 100          |              | × 1    | 100          |
|                           | × 2    | 50        |              | × 2    | 50           |              | × 2    | 50           |
|                           | × 0.5  | 300       |              | × 0.5  | 300          |              | × 0.5  | 300          |
|                           | × 1    | 150       |              | × 1    | 150          |              | × 1    | 150          |
|                           | × 2    | 75        |              | × 2    | 75           |              | × 2    | 75           |

## Model validation based on CFC-11 emissions estimate from eastern China

65 To validate the optimization of our inversion framework, we analyzed CFC-11 emissions from eastern China using Gosan CFC-11 concentration data for 2008–2019. Top-down emissions of CFC-11 in East Asia were well-defined in a recent study (Park et al., 2021) which used multiple inversion methods.

Our results (Figure S4) showed good convergence among the runs for the same *a priori* distribution set, but relatively large (not statistically significant) difference between different *a priori* distributions, suggesting that *a priori* distributions have an  
70 impact on the *a posteriori*, and thus uncertainties associated with different *a priori* settings need to be considered to derive the full *a posteriori* uncertainties.

Figure S5 shows that our CFC-11 emission estimates for eastern China are consistent within uncertainties with previously reported results from four different inverse methods that used Gosan observation data (only) (Park et al., 2021). Since the previous study with four different inverse models had used “Asiaflat” *a priori*, our estimation was also made with the same  
75 *a priori* for direct comparison.

We took the mean of the *a posteriori* annual inversion results from 27 independent inversions with different *a priori* settings (see Table S2) as our final estimates of CFC-11 emissions from eastern China for 2008–2019 (Figure S6 and Table S3) and their uncertainties were defined as  $2\text{-}\sigma$  of the resulting *a posteriori* emissions (95 % uncertainty), because the uncertainty of each inversion run can be considered fully correlated with each other. Our final emissions estimates of CFC-  
80 11 for eastern China are also consistent with previously reported results from four different inverse methods within uncertainties (Figure S6).

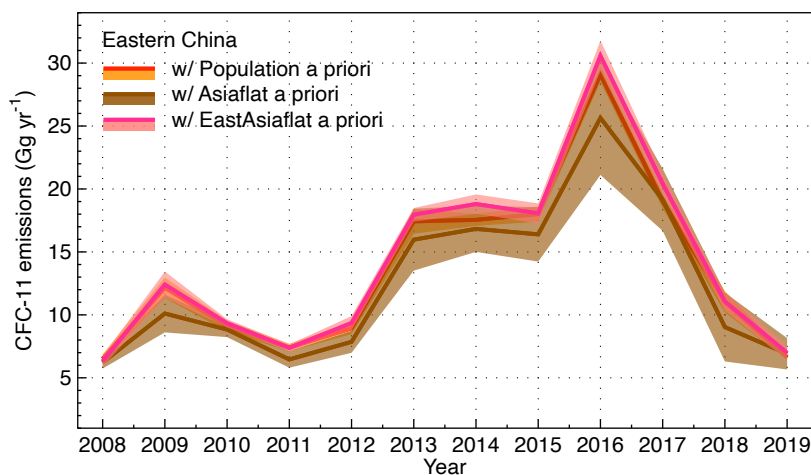

Figure S4: CFC-11 emissions from eastern China derived using three different *a priori* distributions: “Population”, “Asiaflat”,  
85 “EastAsiaflat” *a prioris*. Each line represents the annual mean of 9 different model set-ups for each *a priori* distribution. Shading denotes  $2\text{-}\sigma$  uncertainties.

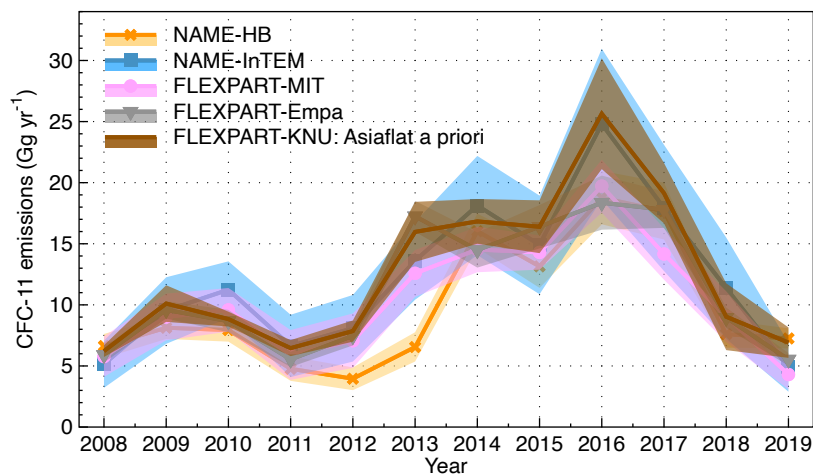

Figure S5: CFC-11 emissions from eastern China derived using the “Asiaflat” *a priori* distribution. Top-down emissions using FLEXPART-KNU (brown line) are compared to previously reported emissions from four different inverse methods using the same Gosan data for 2008–2019: NAME-HB (yellow crosses), NAME-InTEM (blue squares), FLEXPART-MIT (pink circles) and FLEXPART-Empa (gray triangles).

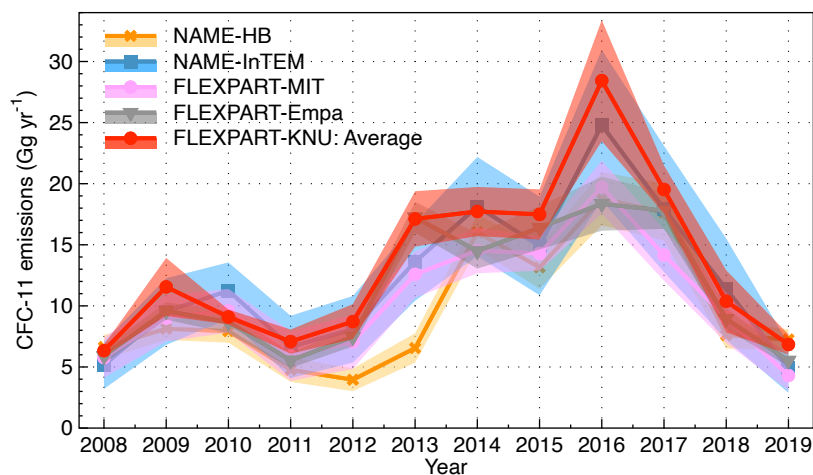

Figure S6: CFC-11 emissions estimate for eastern China derived in this study (FLEXPART-KNU, red circles) compared to previously derived emissions. Our annual results represent the mean of 27 different model runs, where each set of three different *a priori* distributions have 9 combinations of different emission magnitudes and 2- $\sigma$  uncertainties (shading).

**Table S3: Top-down emissions (Gg yr<sup>-1</sup>) of CFC-11 and HCFC-22 for eastern China**

| Year | CFC-11        |       |       | HCFC-22       |        |       |
|------|---------------|-------|-------|---------------|--------|-------|
|      | Eastern China |       |       | Eastern China |        |       |
|      | mean          | max   | min   | mean          | max    | min   |
| 2008 | 6.34          | 6.81  | 5.86  | 40.99         | 45.53  | 36.44 |
| 2009 | 11.55         | 13.92 | 9.18  | 60.96         | 76.40  | 45.51 |
| 2010 | 9.09          | 9.70  | 8.48  | 62.45         | 73.46  | 51.44 |
| 2011 | 7.08          | 8.07  | 6.09  | 47.36         | 59.20  | 35.52 |
| 2012 | 8.72          | 10.15 | 7.29  | 43.37         | 51.17  | 35.56 |
| 2013 | 17.12         | 19.39 | 14.85 | 61.07         | 70.27  | 51.87 |
| 2014 | 17.73         | 19.73 | 15.72 | 59.43         | 68.57  | 50.30 |
| 2015 | 17.48         | 19.54 | 15.43 | 58.80         | 66.67  | 50.93 |
| 2016 | 28.44         | 33.39 | 23.48 | 88.13         | 111.27 | 64.98 |
| 2017 | 19.53         | 21.49 | 17.56 | 87.23         | 102.62 | 71.84 |
| 2018 | 10.38         | 12.92 | 7.84  | 64.89         | 83.67  | 46.12 |
| 2019 | 6.84          | 7.66  | 6.01  | 86.89         | 100.13 | 73.64 |

## SI. References

- Arnold, T., Manning, A. J., Kim, J., Li, S., Webster, H., Thomson, D., Mühle, J., Weiss, R. F., Park, S., and O'doherty, S.: Inverse modelling of CF<sub>4</sub> and NF<sub>3</sub> emissions in East Asia, *Atmospheric Chemistry and Physics*, 18, 13305-13320, 2018.
- 105 Fang, X., Stohl, A., Yokouchi, Y., Kim, J., Li, S., Saito, T., Park, S., and Hu, J.: Multiannual top-down estimate of HFC-23 emissions in East Asia, *Environmental Science & Technology*, 49, 4345-4353, 2015.
- Fang, X., Yao, B., Vollmer, M., Reimann, S., Liu, L., Chen, L., Prinn, R., and Hu, J.: Changes in HCFC emissions in China during 2011–2017, *Geophysical Research Letters*, 46, 10034-10042, 2019.
- Inside Climate News: China Moves to Freeze Production of Climate Super-Pollutants But Lacks a System to Monitor Emissions, 2022. <https://insideclimatenews.org/news/21012022/china-super-pollutant-emissions/>
- 110 Kim, J., Li, S., Kim, K. R., Stohl, A., Mühle, J., Kim, S. K., Park, M. K., Kang, D. J., Lee, G., and Harth, C. M.: Regional atmospheric emissions determined from measurements at Jeju Island, Korea: Halogenated compounds from China, *Geophysical Research Letters*, 37, 2010.
- Kim, J., Thompson, R., Park, H., Bogle, S., Mühle, J., Park, M. K., Kim, Y., Harth, C. M., Salameh, P. K., and Schmidt, R.: Emissions of tetrafluoromethane (CF<sub>4</sub>) and hexafluoroethane (C<sub>2</sub>F<sub>6</sub>) from East Asia: 2008 to 2019, *Journal of Geophysical Research: Atmospheres*, 126, e2021JD034888, 2021.
- 115 Li, S., Kim, J., Kim, K.-R., Mühle, J., Kim, S.-K., Park, M.-K., Stohl, A., Kang, D.-J., Arnold, T., and Harth, C. M.: Emissions of halogenated compounds in East Asia determined from measurements at Jeju Island, Korea, *Environmental science & technology*, 45, 5668-5675, 2011.
- Park, S., Western, L. M., Saito, T., Redington, A. L., Henne, S., Fang, X., Prinn, R. G., Manning, A. J., Montzka, S. A., and Fraser, P. J.: A decline in emissions of CFC-11 and related chemicals from eastern China, *Nature*, 590, 433-437, 2021.
- 120 Rigby, M., Park, S., Saito, T., Western, L., Redington, A., Fang, X., Henne, S., Manning, A., Prinn, R., and Dutton, G.: Increase in CFC-11 emissions from eastern China based on atmospheric observations, *Nature*, 569, 546-550, 2019.
- Simmonds, P. G., Rigby, M., McCulloch, A., Vollmer, M. K., Henne, S., Mühle, J., O'Doherty, S., Manning, A. J., Krummel, P. B., and Fraser, P. J.: Recent increases in the atmospheric growth rate and emissions of HFC-23 (CHF<sub>3</sub>) and the link to
- 125 HCFC-22 (CHClF<sub>2</sub>) production, 2018.
- Stanley, K. M., Say, D., Mühle, J., Harth, C. M., Krummel, P. B., Young, D., O'Doherty, S. J., Salameh, P. K., Simmonds, P. G., and Weiss, R. F.: Increase in global emissions of HFC-23 despite near-total expected reductions, *Nature communications*, 11, 1-6, 2020.
- Stohl, A., Kim, J., Li, S., O'Doherty, S., Mühle, J., Salameh, P. K., Saito, T., Vollmer, M. K., Wan, D., and Weiss, R. F.: Hydrochlorofluorocarbon and hydrofluorocarbon emissions in East Asia determined by inverse modeling, *Atmospheric Chemistry and Physics*, 10, 3545-3560, 2010.
- TEAP: Technology and Economic Assessment Panel of the Montreal Protocol: Assessment Report, United Nations Environment Programme, Nairobi, Kenya, 2017.

Warszawski, L., Frieler, K., Huber, V., Piontek, F., Serdeczny, O., Zhang, X., Tang, Q., Pan, M., Tang, Y., and Tang, Q.:  
135 Center for International Earth Science Information Network—CIESIN—Columbia University. (2016). Gridded population  
of the World, Version 4 (GPWv4): Population density. Palisades, NY: NASA Socioeconomic Data and Applications Center  
(SEDAC). doi: 10. 7927/H4NP22DQ, Atlas of Environmental Risks Facing China Under Climate Change, 228, 2017.  
Yao, B., Vollmer, M., Zhou, L., Henne, S., Reimann, S., Li, P., Wenger, A., and Hill, M.: In-situ measurements of  
atmospheric hydrofluorocarbons (HFCs) and perfluorocarbons (PFCs) at the Shangdianzi regional background station, China,  
140 Atmospheric Chemistry and Physics, 12, 10181-10193, 2012.  
Yokouchi, Y., Taguchi, S., Saito, T., Tohjima, Y., Tanimoto, H., and Mukai, H.: High frequency measurements of HFCs at a  
remote site in east Asia and their implications for Chinese emissions, Geophysical research letters, 33, 2006.
